RESEARCH ARTICLE

# Equations for estimating binary mixture toxicity: 3-methyl-2-butanone with a series of electrophiles

Douglas A. Dawson<sup>1\*</sup>, Terry W. Schultz<sup>2</sup>

**1** Department of Biological Sciences and Toxicology, Ashland University, Ashland, Ohio, United States of America, **2** College of Veterinary Medicine, University of Tennessee, Knoxville, Tennessee, United States of America

\* [dadawson1311@gmail.com](mailto:dadawson1311@gmail.com)

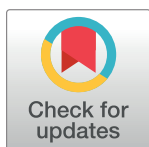

## OPEN ACCESS

**Citation:** Dawson DA, Schultz TW (2024) Equations for estimating binary mixture toxicity: 3-methyl-2-butanone with a series of electrophiles. PLoS ONE 19(7): e0306382. <https://doi.org/10.1371/journal.pone.0306382>

**Editor:** A Ganesan, University of East Anglia, UNITED KINGDOM

**Received:** March 22, 2024

**Accepted:** June 17, 2024

**Published:** July 3, 2024

**Copyright:** © 2024 Dawson, Schultz. This is an open access article distributed under the terms of the [Creative Commons Attribution License](https://creativecommons.org/licenses/by/4.0/), which permits unrestricted use, distribution, and reproduction in any medium, provided the original author and source are credited.

**Data Availability Statement:** The raw data, endpoint values data, the codes for transforms and worksheet regressions and procedures and data interpretation for SigmaPlot-derived analyses, and the slope and asymmetry values for the two mixture toxicity models used in this study are publicly available from the OSF repository (<https://osf.io/2nvdw/>).

**Funding:** The author(s) received no specific funding for this work.

**Competing interests:** The authors have declared that no competing interests exist.

## Abstract

Mixture toxicity was determined for 32 binary combinations. One chemical was the non-reactive, non-polar narcotic 3-methyl-2-butanone (always chemical A) and the other was a potentially reactive electrophile (chemical B). Bioluminescence inhibition in *Allovibrio fischeri* was measured at 15-, 30-, and 45-minutes of exposure for A, B, and the mixture (MX). Concentration-response curves (CRCs) were developed for each chemical and used to develop predicted CRCs for the concentration addition (CA) and independent action (IA) mixture toxicity models. Also, MX CRCs were generated and compared with model predictions using the 45-minute data. Classification of observed mixture toxicity used three specific criteria: 1) predicted IA EC<sub>50</sub> vs. CA EC<sub>50</sub> values at 45-minutes, 2) consistency of 45-minute MX CRC fit to IA, CA, or otherwise at three effect levels (EC<sub>25</sub>, EC<sub>50</sub> and EC<sub>75</sub>), and 3) the known/suspected mechanism of toxicity for chemical B. Mixture toxicity was then classified into one of seven groupings. As a result of the predicted IA EC<sub>50</sub> being more toxic than the predicted CA EC<sub>50</sub>, IA represented the greater toxic hazard. For this reason, non-sham MXs having toxicity consistent with CA were classified as being “coincident” with CA rather than mechanistically-consistent with CA. Multiple linear regression analyses were performed to develop equations that can be used to estimate the toxicity of other 3M2B-containing binary mixtures. These equations were developed from the data for both IA and CA, at each exposure duration and effect level. Each equation had a coefficient of determination ( $r^2$ ) above 0.950 and a variance inflation factor <1.2. This approach can potentially reduce the need for mixture testing and is amenable to other model systems and to assays that evaluate toxicity at low effect levels.

## Introduction

Chemical mixture toxicity is an active area of environmentally-relevant research [1]. Studies have evaluated environmental contamination [2], organic chemicals [3], heavy metals [4],

pharmaceutical presence [5], and habitat impacts [6]. Such studies may focus on a few specific chemicals relevant to situations of concern or include many chemicals of interest.

When many chemicals are present in a mixture at low concentrations relative to their acute aquatic toxicities, their combined effect closely follows concentration addition or simple additivity [7]. This additivity holds even when the chemicals are structurally dissimilar or exhibit different modes of action. However, as the number of chemicals decreases toward binary mixtures, increased variance in additivity is reported [7]. Specifically, binary and complex mixtures of reversible membrane-perturbing chemicals (alkanes, halogenated aliphatics, alcohols, ketones, etc.) tested in bacterial assays indicated additivity in their joint action [8]. In contrast, the toxicity of binary mixtures of non-polar narcotics and reactive aldehydes yielded additive to greater than additive effects in the Microtox assay [9]. Another Microtox study evaluating binary mixtures of reactive toxicants, reported greater than additive effects 18% of the time among chemicals with different mechanisms of toxicity [10]. The authors noted that the slope of a chemical's concentration-response curve is vital in determining the mode of joint toxic actions.

When assessing the hazard posed by chemical mixtures, several mixture toxicity models are available to provide context for the experimentally-exhibited toxicity. Two commonly used models [11] are concentration addition (CA—a.k.a. dose addition) and independent action (IA—a.k.a. independence). The former model, CA [12], describes the combined effect obtained when the chemicals in the mixture act alike, just as if their molecules were the same substance (as in a sham combination). Hence, CA suggests that the chemicals work at the same molecular site of action; however, it is not definitive but depends on the slopes of the concentration-response curves (CRCs) [13]. Various mathematical approaches, generally derivatives of the Hill equation [14, 15], can be used for calculating CA, each appearing effective for given purposes [16–18]. The IA model [19] is used to describe the toxicity associated with chemicals that act at different molecular sites, thereby resulting in an “unaffected” action when applied with another chemical [13]. Independent action has been suggested to be the appropriate model for quantitatively evaluating potentiation and antagonism [13]. For any given mixture, the resulting combined effect may not be consistent with these models.

The models CA and IA were chosen to evaluate the toxicity of electrophiles in binary combinations [20]. Electrophiles are electron-deficient chemicals that can react with electron-rich chemicals called nucleophiles. As Schwöbel and colleagues [21] summarized, exogenous electrophilic substances are in extremes, either hard with low polarizability or soft with high polarization. When introduced into an organism, electrophiles generally follow the rule of like-reacts-with-like (i.e., soft-with-soft and hard-with-hard). However, many electrophiles are not specific regarding their molecular targets - they can react with different biological nucleophilic targets (e.g., S-, N-, and O-containing moieties). Many nucleophilic target sites are found in biological molecules (e.g., proteins, lipids, DNA). Since the principle of like-reacts-with-like applies, hard biological nucleophiles include DNA and amino groups such as lysine. In contrast, soft nucleophiles include thiol groups such as cysteine. These electro(nucleo)philic interactions, via different mechanisms, result in elevated acute toxicity and cytotoxicity.

There are more than 50 specific mechanisms of reactive biomolecular binding [21, 22]. The particular mechanisms are traditionally grouped into “chemical modes of action” (MOA) [23], such as Michael addition, aromatic nucleophilic substitution (S<sub>N</sub>Ar), bi-molecular nucleophilic substitution (S<sub>N</sub>2), and Schiff base formation. These MOA describe direct-acting reactions that covalently modify bio-nucleophiles, subsequently leading to apical toxic events [24] and allow for classifying electrophiles into appropriate mechanistic applicability domains associated with particular chemical spaces [22, 23].

This study tested 3-methyl-2-butanone (3M2B) in binary combination with a series of direct-acting electrophiles. In acute aquatic toxicity profiles, 3M2B is consistently reported as a “neutral organic,” “base surface narcotic,” and “class 1 narcotic” [22]. In the model organism *Allovibrio fischeri*, toxicity manifested as bioluminescence inhibition and was determined for each single chemical and mixture at 15-, 30-, and 45-min of exposure. The results of mixture tests were then compared with effects predicted by the CA and IA models. Additionally, multiple linear regression equations for estimating mixture toxicity were developed to reduce the need for mixture testing.

## Materials and methods

### Chemicals, reagents and toxicity testing

Chemicals tested in this study, including abbreviations, Chemical Abstract Service Registry numbers, SMILES structures, log Kow, vapor pressure and chemical reaction mechanisms are presented (Table 1.) Test chemicals were purchased from Aldrich (Milwaukee, WI) or Sigma (St. Louis, MO) in high purity ( $\geq 95\%$ ) and used without further purification. Dimethyl sulfoxide (DMSO) was used as a carrier solvent; its concentration in test vials was  $\leq 0.1\%$ .

Freeze-dried bacterial reagent, Microtox diluent, and the bacterial reconstitution solution were obtained from Modern Water (New Castle, DE). Vials of bacterial reagent were kept frozen at  $-20^{\circ}\text{C}$  before a 20-minute reconstitution period just prior to test initiation. For each given combination, separate bacterial reagent vials were used to test each chemical alone and the mixture.

The marine bacterium *Allovibrio fischeri* was the model organism, with bioluminescence inhibition being measured with a Microtox analyzer. The acute toxicity testing procedures were noted previously [30]. For each binary combination, each chemical was tested alone, denoted as chemical A (always 3M2B) or B (an electrophile), and the A+B mixture (MX). Each test had seven duplicated concentrations and a duplicated control. Test concentrations were prepared via serial dilution in mg/L and later converted to  $\mu\text{M}$ . Depending primarily on B's toxicity change over time, one of three dilution factors (1.75, 1.867, or 2.0) was used in testing. The dilution factor was kept the same for all tests of a given combination.

Initial light readings for each control and treatment vial were taken before chemical exposure. Toxicity assessments were made after 15-, 30-, and 45-minutes of exposure. During testing, treatment vials were held at  $15^{\circ}\text{C} \pm 0.2^{\circ}\text{C}$ .

### Procedures for curve-fitting and other calculations

Microtox software collected data and converted light readings to percent effect values. The data were input into SigmaPlot (v. 15.0; Inpixon, Palo Alto, CA) and evaluated via user-developed program files. Raw data were fitted to sigmoid curves with a five-parameter logistic function from which the minimum effect parameter had been removed [17]. The remaining parameters were maximum effect,  $\text{EC}_{50}$ , slope, and asymmetry (s). This modified function was designated 5PL-1P to delineate it from the software's standard four and five-parameter logistic functions.

Curve fitting was performed using Eq (1):

$$y = \text{max}/1 + \left(\frac{xb}{x}\right)^{\text{Hillslope}^s} \quad (1)$$

in which  $y$  = % effect,  $\text{max}$  = maximum effect,  $x$  = concentration, and  $s$  = asymmetry. The

Table 1. B-agents for Microtox mixture toxicity studies with 3-methyl-2-butanone.

| Rank <sup>a</sup> | Chemical name                                         | Abbr.  | CAS#       | SMILES <sup>b</sup>                                     | LogKow <sup>c</sup> | Vapor Pressure <sup>d</sup> (mm Hg 25 C) | Chemical Mechanism of Reactivity <sup>e-g</sup>                                                                                                                                                                                                                                                                                                                                                                                                                                                       |
|-------------------|-------------------------------------------------------|--------|------------|---------------------------------------------------------|---------------------|------------------------------------------|-------------------------------------------------------------------------------------------------------------------------------------------------------------------------------------------------------------------------------------------------------------------------------------------------------------------------------------------------------------------------------------------------------------------------------------------------------------------------------------------------------|
| 1                 | 1-Bromo-2,4-dinitrobenzene                            | BDNB   | 584-48-5   | <chem>C1=CC(=C(C(=C1[N+](=O)[O-])[N+](=O)[O-])Br</chem> | 2.53                | 0.0000706                                | Aromatic nucleophilic substitution (SNAr); two activating groups (NO <sub>2</sub> or in-ring N) in ortho- or para-positions to the electronegative leaving group (F > Cl > Br > I); <b>a Br ortho and para to the two NO<sub>2</sub> groups</b> . A <u>proven soft electrophile</u> , experimentally <u>highly reactive</u> with glutathione.; binding potency with cysteine is positive- above 21%, binding potency with lysine is negative- below 9%.                                               |
| 2                 | 1-Chloro-2,4-dinitrobenzene                           | CDNB   | 97-00-7    | <chem>C1=CC(=C(C(=C1[N+](=O)[O-])[N+](=O)[O-])Cl</chem> | 2.17                | 0.0000849                                | Aromatic nucleophilic substitution (SNAr); two activating groups (NO <sub>2</sub> or in-ring N) in ortho- or para-positions to the electronegative leaving group (F > Cl > Br > I); <b>a Cl ortho and para to the two NO<sub>2</sub> groups</b> . A <u>proven soft electrophile</u> , experimentally <u>highly reactive</u> with glutathione. Experimentally <u>strongly positive</u> in the direct peptide reactivity assay (DPRA), predicted binding potency with cysteine and lysine is above 21%. |
| 3                 | 2,6-Dichloro-4-nitropyridine                          | 26D4NP | 25194-01-8 | <chem>[O-][N+](=O)C1=CC(Cl)=NC(Cl)=C1</chem>            | 1.91                | 0.00221                                  | Aromatic nucleophilic substitution (SNAr); two activating groups (NO <sub>2</sub> or in-ring N) in ortho- or para-positions to the leaving group; <b>two Cl both ortho to the in-ring N-atom</b> . A <u>likely soft electrophile</u> , experimentally <u>highly reactive</u> with glutathione but is not predicted to be reactive with cysteine or lysine.                                                                                                                                            |
| 4                 | 2-Chloro-4-nitropyridine                              | 2C4NP  | 23056-36-2 | <chem>[O-][N+](=O)C1=CC(Cl)=NC=C1</chem>                | 1.27                | 0.0153                                   | Aromatic nucleophilic substitution (SNAr); two activating groups (NO <sub>2</sub> or in-ring N) in ortho- or para-positions to the leaving group; <b>a Cl ortho to the in-ring N-atom</b> . A <u>probable soft electrophile</u> , <u>unclassified</u> for glutathione reactivity (i.e., basic pH-dependent reactivity) and not predicted to be reactive with cystine or lysine.                                                                                                                       |
| 5                 | Ethyl bromoacetate                                    | EBAC   | 105-36-2   | <chem>CCOC(=O)CBr</chem>                                | 1.12                | 224                                      | Bimolecular nucleophilic substitution (SN2) at the sp <sup>3</sup> carbon atom; leaving group F << Cl << Br ≈ I; activating group (-C(=O)-) > (-C(=O)O-) > (-C(=O)NH <sub>2</sub> ) ≈ (-C≡N); <b>a Br beta to the carbonyl group</b> . A <u>proven soft electrophile</u> , experimentally <u>extremely reactive</u> with glutathione; predicted binding potency with cysteine and lysine is positive- above 21%.                                                                                      |
| 6                 | 3-Chloro-2,4-pentanedione; 3-chloropentane-2,4-dione  | 3C24P  | 1694-29-7  | <chem>CC(=O)C(C(=O)C)Cl</chem>                          | 0.23                | 1.30                                     | Bimolecular nucleophilic substitution (SN2) at the sp <sup>3</sup> carbon atom; leaving group F << Cl << Br ≈ I; activating group (-C(=O)-) > (-C(=O)O-) > (-C(=O)NH <sub>2</sub> ) ≈ (-C≡N); <b>a Cl beta to both carbonyl groups</b> . A <u>likely soft electrophile</u> , experimentally <u>highly reactive</u> with glutathione. The structure is out of the domain for cysteine or lysine binding predictions.                                                                                   |
| 7                 | 4-Nitrobenzyl bromide; 1-(bromomethyl)-4-nitrobenzene | 4NBB   | 100-11-8   | <chem>C1=CC(=CC=C1CBr)[N+](=O)[O-]</chem>               | 2.70                | 0.000977                                 | Bimolecular nucleophilic substitution (SN2) on benzylic carbon atom; leaving group F << Cl << Br ≈ I; activating group nitrobenzene; <b>a Br para to a NO<sub>2</sub>-benzyl group</b> . A <u>likely soft electrophile</u> , experimentally <u>highly reactive</u> with glutathione; predicted binding potency with cysteine is positive- above 21%, predicted binding potency with lysine is negative- below 9%.                                                                                     |

(Continued)

Table 1. (Continued)

| Rank <sup>a</sup> | Chemical name                                      | Abbr. | CAS#      | SMILES <sup>b</sup> | LogKow <sup>c</sup> | Vapor Pressure <sup>d</sup> (mm Hg 25 C) | Chemical Mechanism of Reactivity <sup>e-g</sup>                                                                                                                                                                                                                                                                                                                                                                                                                                                                                                                           |
|-------------------|----------------------------------------------------|-------|-----------|---------------------|---------------------|------------------------------------------|---------------------------------------------------------------------------------------------------------------------------------------------------------------------------------------------------------------------------------------------------------------------------------------------------------------------------------------------------------------------------------------------------------------------------------------------------------------------------------------------------------------------------------------------------------------------------|
| 8                 | Methyl-2-bromopropionate                           | M2BP  | 5445-17-0 | CC(C(=O)OC)Br       | 1.13                | 6.26                                     | Bimolecular nucleophilic substitution (SN2) at the sp <sup>3</sup> carbon atom; F << Cl << Br ≈ I; activating group (-C(=O)-) > (-C(=O)O-) > (-C(=O)NH <sub>2</sub> ) ≈ (-C≡N); <b>a Br beta to the carbonyl group</b> . A <u>likely soft electrophile</u> , experimentally <u>highly reactive</u> with glutathione; predicted binding potency with cysteine and lysine is negative- below 9%.                                                                                                                                                                            |
| 9                 | Ethyl propiolate; ethyl prop-2-ynoate              | EP    | 623-47-2  | CCOC(=O)C#C         | 0.58                | 15.6                                     | Micheal addition (MA) for the activating moiety (R-C(=O)-R), alkynes (C#C) > corresponding alkenes (C=C); terminal acetylenic > internal ethynylene; <b>an acetylenic group beta to a carbonyl group</b> . A <u>likely soft electrophile</u> , experimentally <u>highly reactive</u> with glutathione. The structure is out of the domain for cysteine or lysine binding predictions.                                                                                                                                                                                     |
| 10                | Chloroacetonitrile; 2-chloroacetonitrile           | CLAN  | 107-14-2  | C(C#N)Cl            | 0.45                | 0.150                                    | Bimolecular nucleophilic substitution (SN2) at the sp <sup>3</sup> -Carbon atom; F << Cl << Br ≈ I; activating group (-C(=O)-) > (-C(=O)O-) > (-C(=O)NH <sub>2</sub> ) ≈ (-C≡N); <b>a Cl beta to a nitrile group</b> . A <u>likely soft electrophile</u> , experimentally <u>moderately reactive</u> with glutathione. The structure is out of the domain for cysteine or lysine binding predictions.                                                                                                                                                                     |
| 11                | 3-Methyl-2-butanone; 3-methylbutan-2-one           | 3M2B  | 563-80-4  | CC(C)C(=O)C         | 0.84                | 52.2                                     | Nonpolar narcosis (NPN); baseline toxicity; a <u>proven non-electrophile</u> , experimentally nonreactive with glutathione reactivity at saturation 250mM, predicted cystine and lysine binding is negative- below 9%. The impaired membrane-related processes are due to the nonspecific intercalation of chemicals in biological membranes.                                                                                                                                                                                                                             |
| 12                | Trichloroacetonitrile; 2,2,2-trichloroacetonitrile | TCLAN | 545-06-2  | C(#N)C(Cl)(Cl)Cl    | 2.09                | 74.1                                     | Halogenated nitrile; Bimolecular nucleophilic substitution (SN2) at the sp <sup>3</sup> carbon atom; F << Cl << Br ≈ I; reactivity increase with number of halogens; activating group (-C(=O)-) > (-C(=O)O-) > (-C(=O)NH <sub>2</sub> ) ≈ (-C≡N); <b>three Cl groups beta to a nitrile group</b> . A <u>probable soft electrophile</u> , experimentally not reactive with glutathione at saturation; predicted cysteine binding is positive- above 21%, predicted lysine binding is positive- above 21%.                                                                  |
| 13                | Ethyl acrylate; ethyl prop-2-enoate                | EA    | 140-88-5  | CCOC(=O)C=C         | 1.32                | 38.6                                     | Beta-unsaturated ester; Micheal addition (MA); for the activating moiety, (R-C(=O)-R), alkynes (C#C) > corresponding alkenes (C=C); terminal vinyl > internal vinylene; unsubstituted alkenes > alkyl-substituted alkenes with α-C monoalkyl-substituted alkenes > β-C monoalkyl-substituted alkenes > α,β-C dialkyl-substituted alkenes; <b>a vinyl group beta to a carbonyl group</b> . A <u>proven soft electrophile</u> , <u>highly reactive</u> with glutathione; predicted cystine binding is positive- above 21%, predicted lysine binding is positive— above 21%. |

(Continued)

Table 1. (Continued)

| Rank <sup>a</sup> | Chemical name                            | Abbr. | CAS#      | SMILES <sup>b</sup> | LogKow <sup>c</sup> | Vapor Pressure <sup>d</sup> (mm Hg 25 C) | Chemical Mechanism of Reactivity <sup>e-g</sup>                                                                                                                                                                                                                                                                                                                                                                                                                                                                                                                                                                     |
|-------------------|------------------------------------------|-------|-----------|---------------------|---------------------|------------------------------------------|---------------------------------------------------------------------------------------------------------------------------------------------------------------------------------------------------------------------------------------------------------------------------------------------------------------------------------------------------------------------------------------------------------------------------------------------------------------------------------------------------------------------------------------------------------------------------------------------------------------------|
| 14                | Methyl vinyl ketone; but-3-en-2-one      | MVK   | 78-94-4   | CC(=O)C=C           | 0.41                | 91.3                                     | Beta-unsaturated ketone; Micheal addition (MA); for the activating moiety, (R-C(=O)-R), alkynes (C#C) > corresponding alkenes (C=C); terminal vinyl > internal vinylene; unsubstituted alkenes > alkyl-substituted alkenes with $\alpha$ -C monoalkyl-substituted alkenes > $\beta$ -C monoalkyl-substituted alkenes > $\alpha,\beta$ -C dialkyl-substituted alkenes; <b>a vinyl group beta to a carbonyl group</b> . A proven soft electrophile, experimentally extremely reactive with glutathione; predicted cysteine binding is positive- above 21%, predicted lysine binding is uncertain- between 9% and 21%. |
| 15                | 2,3-Pentandione; pentane-2,3-dione       | 23P   | 600-14-6  | CCC(=O)C(=O)C       | -0.85               | 31.1                                     | Alpha-beta-diketone, <b><math>\alpha,\beta</math>-Dicarbonyl</b> Schiff base former (Di-Sbf); a probable soft electrophile, unclassified for glutathione reactivity (i.e., non-covalent reaction); predicted cysteine binding is positive—above 21%, and predicted lysine binding is positive—above 21%.                                                                                                                                                                                                                                                                                                            |
| 16                | Ethyl chloroacetate                      | ECAC  | 105-39-5  | CCOC(=O)CCl         | 0.94                | 4.87                                     | Halogenated ester; Bimolecular nucleophilic substitution (SN2) at the sp <sup>3</sup> carbon atom; F << Cl << Br $\approx$ I; reactivity increase with number of halogens; activating group (-C(=O)-) > (-C(=O)O-) > (-C(=O)NH <sub>2</sub> ) $\approx$ (-C $\equiv$ N); <b>a Cl beta to a carbonyl group</b> . A proven soft electrophile, experimentally moderately reactive with glutathione; predicted cysteine binding is positive- above 21%, predicted lysine binding is positive- above 21%.                                                                                                                |
| 17                | 2,3-Butandione; butane-2,3-dione         | 23B   | 431-03-8  | CC(=O)C(C)=O        | -1.34               | 56.8                                     | Alpha-beta-diketone; <b><math>\alpha,\beta</math>-Dicarbonyl</b> Schiff base former (Di-Sbf); a probable soft electrophile, unclassified for glutathione reactivity (i.e., non-covalent reaction). Experimentally strongly positive in the direct peptide reactivity assay (DPRA), predicted binding potency with cysteine and lysine is above 21%.                                                                                                                                                                                                                                                                 |
| 18                | Ethyl vinyl ketone; pent-1-en-3-one      | EVK   | 1629-58-9 | CCC(=O)C=C          | 0.90                | 38.2                                     | Beta-unsaturated ketone; Micheal addition (MA); for the activating moiety, (R-C(=O)-R), alkynes (C#C) > corresponding alkenes (C=C); terminal vinyl > internal vinylene; unsubstituted alkenes > alkyl-substituted alkenes with $\alpha$ -C monoalkyl-substituted alkenes > $\beta$ -C monoalkyl-substituted alkenes > $\alpha,\beta$ -C dialkyl-substituted alkenes; <b>a vinyl group beta to a carbonyl group</b> . A proven soft electrophile, experimentally extremely reactive with glutathione; predicted cysteine binding is positive- above 21%, predicted lysine binding is uncertain- between 9% and 21%. |
| 19                | 3-Chloro-2-butanone; 3-chlorobutan-2-one | 3C2B  | 4091-39-8 | CC(C(=O)C)Cl        | 0.44                | 19.5                                     | Halogenated ketone; Bimolecular nucleophilic substitution (SN2) at the sp <sup>3</sup> carbon atom; F << Cl << Br $\approx$ I; activating group (-C(=O)-) > (-C(=O)O-) > (-C(=O)NH <sub>2</sub> ) $\approx$ (-C $\equiv$ N); <b>a Cl beta to the carbonyl group</b> . A likely soft electrophile, experimentally moderately reactive with glutathione. The structure is out of the domain of cysteine or lysine predictions.                                                                                                                                                                                        |

(Continued)

Table 1. (Continued)

| Rank <sup>a</sup> | Chemical name                                               | Abbr. | CAS#      | SMILES <sup>b</sup>         | LogKow <sup>c</sup> | Vapor Pressure <sup>d</sup> (mm Hg 25 C) | Chemical Mechanism of Reactivity <sup>e-g</sup>                                                                                                                                                                                                                                                                                                                                                                                                                                                                                                                                                                                                |
|-------------------|-------------------------------------------------------------|-------|-----------|-----------------------------|---------------------|------------------------------------------|------------------------------------------------------------------------------------------------------------------------------------------------------------------------------------------------------------------------------------------------------------------------------------------------------------------------------------------------------------------------------------------------------------------------------------------------------------------------------------------------------------------------------------------------------------------------------------------------------------------------------------------------|
| 20                | Methyl crotonate; methyl (E)-but-2-enoate                   | MC    | 623-43-8  | C/C = C/C (= O)OC           | 1.14                | 17.1                                     | Beta-unsaturated ester; Micheal addition (MA); for the activating moiety, (R-C (= O)-R), alkynes (C#C) > corresponding alkenes (C = C); terminal vinyl > internal vinylene; unsubstituted alkenes > alkyl-substituted alkenes with $\alpha$ -C monoalkyl-substituted alkenes > $\beta$ -C monoalkyl-substituted alkenes > $\alpha,\beta$ -C dialkyl-substituted alkenes; <b>a vinylene group beta to a carbonyl group</b> . A likely soft electrophile, experimentally moderately reactive with glutathione. The structure is out of the domain of cysteine or lysine predictions.                                                             |
| 21                | 3,4-Hexandione; hexane-3,4-dione                            | 34H   | 4437-51-8 | CCC (= O)C (= O)CC          | -0.35               | 12.3                                     | Alpha-beta-diketone; <b><math>\alpha,\beta</math>-Dicarbonyl</b> Schiff base former (Di-Sbf); a probable soft electrophile that is unclassified for glutathione reactivity (i.e., non-covalent reaction); predicted cysteine binding is positive- above 21%, predicted lysine binding is positive- above 21%.                                                                                                                                                                                                                                                                                                                                  |
| 22                | Methyl-2-chloroacetoacetate; methyl 2-chloro-3-oxobutanoate | M2CA  | 4755-81-1 | CC (= O)C(C (= O)OC)Cl      | -0.51               | 0.956                                    | Halogenated ester; Bimolecular nucleophilic substitution (SN2) at the sp3 carbon atom; F << Cl << Br $\approx$ I; activating group (-C (= O)-) > (-C (= O)O-) > (-C (= O)NH2) $\approx$ (-C $\equiv$ N); <b>a Cl beta to a carbonyl group</b> . A likely soft electrophile, experimentally highly reactive with glutathione; predicted cysteine and lysine binding are negative - below 9%.                                                                                                                                                                                                                                                    |
| 23                | Diethyl maleate; diethyl (Z)-but-2-enedioate                | DEM   | 141-05-9  | CCOC (= O)/C = C\C (= O)OCC | 2.20                | 0.178                                    | Beta-unsaturated ketone; Micheal addition (MA); for the activating moiety, (R-C (= O)-R), alkynes (C#C) > corresponding alkenes (C = C); terminal vinyl > internal vinylene; unsubstituted alkenes > alkyl-substituted alkenes with $\alpha$ -C monoalkyl-substituted alkenes > $\beta$ -C monoalkyl-substituted alkenes > $\alpha,\beta$ -C dialkyl-substituted alkenes; trans isomer > cis isomer; <b>a vinylene group beta to two carbonyl groups</b> . A proven soft electrophile, experimentally extremely reactive with glutathione; predicted cysteine binding is positive- above 21%, predicted lysine binding is positive- above 21%. |
| 24                | Bromoacetonitrile; 2-bromoacetonitrile                      | BRAN  | 590-17-0  | C(C#N)Br                    | 0.20                | 4.33                                     | Halogenated nitrile; Bimolecular nucleophilic substitution (SN2) at the sp3 carbon atom; F << Cl << Br $\approx$ I; activating group (-C (= O)-) > (-C (= O)O-) > (-C (= O)NH2) $\approx$ (-C $\equiv$ N); <b>a Br beta to a nitrile group</b> . A likely soft electrophile, experimentally highly reactive with glutathione. The structure is out of the domain of cysteine or lysine predictions.                                                                                                                                                                                                                                            |
| 25                | Ethyl fluoroacetate                                         | EFAC  | 459-72-3  | CCOC (= O)CF                | 0.80                | 15.6                                     | Halogenated ester; <b>No alerts found</b> ; suspected bimolecular nucleophilic substitution (SN2) at the sp3 carbon atom; F << Cl << Br $\approx$ I; activating group (-C (= O)-) > (-C (= O)O-) > (-C (= O)NH2) $\approx$ (-C $\equiv$ N); <b>a F beta to a carbonyl group</b> . A proven non-electrophile, nonreactive with glutathione reactivity at 250mM, predicted cystine and lysine binding is negative- below 9%.                                                                                                                                                                                                                     |

(Continued)



Table 1. (Continued)

| Rank <sup>a</sup> | Chemical name                                                     | Abbr. | CAS#       | SMILES <sup>b</sup> | LogKow <sup>c</sup> | Vapor Pressure <sup>d</sup> (mm Hg 25 C) | Chemical Mechanism of Reactivity <sup>e-g</sup>                                                                                                                                                                                                                                                                                                                                                                                                                                                                                                                                                                                                                                                  |
|-------------------|-------------------------------------------------------------------|-------|------------|---------------------|---------------------|------------------------------------------|--------------------------------------------------------------------------------------------------------------------------------------------------------------------------------------------------------------------------------------------------------------------------------------------------------------------------------------------------------------------------------------------------------------------------------------------------------------------------------------------------------------------------------------------------------------------------------------------------------------------------------------------------------------------------------------------------|
| 26                | Iodoacetoneitrile; 2-iodoacetoneitrile                            | IAN   | 624-75-9   | C(C#N)I             | 0.61                | 0.757                                    | Halogenated nitrile; Bimolecular nucleophilic substitution (SN2) at the sp3 carbon atom; F << Cl << Br ≈ I; activating group (-C(=O)-) > (-C(=O)O-) > (-C(=O)NH2) ≈ (-C≡N); <b>a I beta to a nitrile group</b> . A likely soft electrophile, experimentally <u>highly reactive</u> with glutathione. The structure is out of the domain of cysteine or lysine predictions.                                                                                                                                                                                                                                                                                                                       |
| 27                | 2-Hydroxyethylacrylate; 2-hydroxyethyl prop-2-enoate              | 2HEA  | 818-61-1   | C = CC(=O)OCCO      | -0.21               | 0.0523                                   | Beta-unsaturated ester; Micheal addition (MA); for the activating moiety, (R-C(=O)-R), alkynes (C#C) > corresponding alkenes (C=C); terminal vinyl > internal vinylene; unsubstituted alkenes > alkyl-substituted alkenes with α-C monoalkyl-substituted alkenes > β-C monoalkyl-substituted alkenes > α,β-C dialkyl-substituted alkenes; <b>a vinyl group beta to a carbonyl group</b> . A proven soft electrophile, experimentally <u>highly reactive</u> with glutathione. Experimentally <u>strongly positive</u> in the direct peptide reactivity assay (DPRA), predicted binding potency with cysteine and lysine is above 21%.                                                            |
| 28                | Hydroxypropyl methacrylate; 2-hydroxypropyl 2-methylprop-2-enoate | HPM   | 27813-02-1 | CC(COC(=O)C(=C)C)O  | 0.95                | 0.0724                                   | Beta-unsaturated ester; Micheal addition (MA); for the activating moiety, (R-C(=O)-R), alkynes (C#C) > corresponding alkenes (C=C); terminal vinyl > internal vinylene; unsubstituted alkenes > alkyl-substituted alkenes with α-C monoalkyl-substituted alkenes > β-C monoalkyl-substituted alkenes > α,β-C dialkyl-substituted alkenes; <b>an electronically hindered vinyl group beta to a carbonyl group</b> . A likely soft electrophile, experimentally <u>slightly reactive</u> with glutathione. Experimentally <u>weakly positive</u> in the direct peptide reactivity assay (DPRA), predicted cysteine binding is positive- above 21%, predicted lysine binding is negative- below 9%. |
| 29                | Diethyl sulfate                                                   | DES   | 64-67-5    | CCOS(=O)(=O)OCC     | 1.14                | 0.212                                    | Alkyl sulfate; bimolecular nucleophilic substitution (SN2) substitution at the sp3 carbon; <b>an OS(=O)(=O)OR moiety as the leaving group</b> . A likely soft electrophile, experimentally <u>moderately reactive</u> with glutathione; predicted cysteine binding is positive- above 21%; predicted lysine binding is uncertain- between 9 and 21%.                                                                                                                                                                                                                                                                                                                                             |
| 30                | Dimethyl sulfate                                                  | DMS   | 77-78-1    | COS(=O)(=O)OC       | 0.16                | 0.667                                    | Alkyl sulfate; Bimolecular nucleophilic substitution (SN2) substitution at the sp3 carbon; <b>an OS(=O)(=O)OR moiety as the leaving group</b> . A likely soft electrophile, experimentally <u>moderately reactive</u> with glutathione; predicted cysteine binding is positive- above 21%; predicted lysine binding is uncertain- between 9% and 21%.                                                                                                                                                                                                                                                                                                                                            |
| 31                | Butyl glycidyl ether; 2-(butoxymethyl)oxirane                     | BGE   | 2426-08-6  | CCCCOCC1CO1         | 0.63                | 3.20                                     | Cyclic ether; Epoxide ring-opening bi-molecular nucleophilic substitution reaction (ERO-SN2); A <u>probable soft electrophile</u> , experimentally <u>slightly reactive</u> with glutathione; predicted cysteine binding is positive- above 21%, predicted lysine binding is uncertain- between 9% and 21%.                                                                                                                                                                                                                                                                                                                                                                                      |

(Continued)



Table 1. (Continued)

| Rank <sup>a</sup> | Chemical name                      | Abbr. | CAS#     | SMILES <sup>b</sup>    | LogKow <sup>c</sup> | Vapor Pressure <sup>d</sup> (mm Hg 25 C) | Chemical Mechanism of Reactivity <sup>e,g</sup>                                                                                                                                                                                                                                                                                                                                                                                                                                                                                                                                                                          |
|-------------------|------------------------------------|-------|----------|------------------------|---------------------|------------------------------------------|--------------------------------------------------------------------------------------------------------------------------------------------------------------------------------------------------------------------------------------------------------------------------------------------------------------------------------------------------------------------------------------------------------------------------------------------------------------------------------------------------------------------------------------------------------------------------------------------------------------------------|
| 32                | 4-Vinylpyridine; 4-ethenylpyridine | 4VP   | 100-43-6 | C = CC1 = CC = NC = C1 | 1.71                | 1.70                                     | Pyridine; Michael addition (MA); aromatic activated double bond. Profiling in the OECD QSAR Toolbox V 4.5 gives mixed results. In early aquatic toxicity classification schemes, 4VP is classified as Class 1 narcotic, baseline toxicant, or neutral organic; Subsequently, it was classified as reactive unspecified or non-categorized. 4VP is Ames mutagenicity positive, CHO clastogenicity positive, and a skin sensitizer. A proven soft electrophile, experimentally <u>highly reactive</u> with glutathione; predicted cysteine binding is positive- above 21%, predicted lysine binding is negative- below 9%. |

<sup>a</sup> Rank is listed from most to least toxic as predicted by the 45-min EC<sub>50</sub> for independent action (IA).

<sup>b</sup> SMILES, Simplified Molecular-Input Line-Entry System notation of chemical structure.

<sup>c</sup> Log Kow (1-octanol/water partition coefficient) values were secured from EPI Suite v4.11.

<sup>d</sup> Vapor pressure values were secured from EPI Suite v4.11.

<sup>e</sup> Chemical mechanism of reactivity was derived following the descriptions within [23–25].

<sup>f</sup> in chemico glutathione reactivity was assessed following the protocol in [26]; experimental values were reported in [22].

<sup>g</sup> Direct peptide reactivity assay predictions followed the protocol in [27]; experimental values were reported by [28], and predictions were made from [22].

<https://doi.org/10.1371/journal.pone.0306382.t001>

variable  $xb$  was determined using Eq (2).

$$xb = EC50 \times 10^{\frac{1}{Hilllope}} * \log 2^{1/s} - 1 \quad (2)$$

Initial parameters for these regressions were estimated automatically. The following constraints were used for data fitting: a) EC<sub>50</sub> > 0, b) 0.1 <  $s$  < 10, c) max = 100.

For all concentration–response data, the following effective concentration values: EC<sub>25</sub>, EC<sub>50</sub>, and EC<sub>75</sub>, as well as slope, asymmetry ( $s$ ), maximum effect, and coefficient of determination (CD or  $r^2$ ) values were calculated for A, B, and MX at each exposure duration. For the B and MX tests, chemical concentrations were converted to 3M2B-equivalents via the B factor from Eq (3) [29]:

$$[B_f] = [A]/[B]. \quad (3)$$

Time-dependent toxicity (TDT) values were calculated by Eq 4:

$$TDT = ((15\text{min}EC50 - 45\text{min}EC50)/(15\text{min}EC50 \times 0.667)) \times 100 \quad (4)$$

to give a percentage-based value [30]. These calculations were made separately for each combination of A, B, and MX.

Calculation procedures for obtaining predicted CRCs for the CA and IA models have been described [31]. When A and B are equally effective in CA, the CA EC<sub>50</sub> is left-shifted (when viewed graphically) by a dose-ratio (DR) factor of two. The CA<sub>50</sub> and DR were calculated using Eqs 5 and 6, respectively.

$$CA50 = a50/DR50 \quad (5)$$

Herein, CA<sub>50</sub> is the EC<sub>50</sub> for CA,  $a_{50}$  is the EC<sub>50</sub> of the more potent single chemical, and  $b_{50}$

is the  $EC_{50}$  of the less potent single chemical.

$$DR_{50} = 1 + \left( \frac{a_{50}}{b_{50}} \right) \quad (6)$$

Therefore, when  $a_{50} = b_{50}$  the  $DR_{50} = 1 + (1) = 2$ , that is, the  $CA_{50} = a_{50}/2$ . This approach allows one to calculate the predicted CA  $EC_{50}$  when A and B are not exactly equally effective (very common) using the calculated DR to adjust the predicted CA value. For example, suppose A has an  $EC_{50}$  of 52.4  $\mu$ M and B has an A-equivalent concentration  $EC_{50}$  of 61.7  $\mu$ M. The DR is  $1 + (52.4/61.7) = 1.8493$ . In this example, A was the more potent agent, so the  $EC_{50}$  for A was divided by this DR value to give the CA  $EC_{50}$  of 28.3  $\mu$ M. Calculations of the  $EC_{25}$  and  $EC_{75}$  values for the predicted CA curve were performed in this same manner. This approach allows the DR to be adjusted at different  $EC_x$  levels (i.e.,  $EC_{25}$ ,  $EC_{50}$ , and  $EC_{75}$ ) and, for example, in situations in which A is more potent than B at the  $EC_{25}$ , but B is more potent than A at the  $EC_{50}$  and  $EC_{75}$ . Taken together, the predicted CA values for  $EC_{25}$ ,  $EC_{50}$ , and  $EC_{75}$ , as well as the CA maximum effect value (Eq 7) allow calculating the predicted CA curve using the 5PL-1P curve fitting procedure noted above.

$$\max = a_{50} \times 100x \quad (7)$$

Theoretical curves for the IA model were developed using Eq 8:

$$yA + \left( yB \times \frac{100 - yA}{100} \right) \quad (8)$$

with  $yA$  and  $yB$  being percent effect values for A and B, respectively.

For each combination and exposure duration, the three  $EC_x$  values were calculated for A, B, MX, and for the predicted CA and IA curves. Concentration addition quotient (AQ) values were calculated via Eq 9:

$$AQ_x = MXEC_x / CAEC_x \quad (9)$$

in which the subscript x can represent either the 25, 50 or 75% effect levels. Likewise, independent action quotient (IQ) values were calculated using Eq 10:

$$IQ_x = MXEC_x / IAEC_x \quad (10)$$

Final mixture toxicity determinations vs. the CA and IA models were made for each combination by determining: 1) whether the predicted 45-min IA  $EC_{50}$  was more toxic than that for CA, 2) whether the three 45-min  $AQ_x$  or  $IQ_x$  values, respectively, were from 0.90 to 1.10, and 3) by giving due consideration to the mechanisms of toxic action for A and B (as per Table 1).

## Statistical analyses

Statistical tests within SigmaPlot were used to analyze the data further. In the study, 32 binary combinations were tested; for each 3M2B served as chemical A. Since one combination was a sham (i.e., 3M2B with 3M2B), there were a total of 33 tests of 3M2B alone. To determine the repeatability of the 3M2B-alone tests, the mean, standard deviation, coefficient of variation (CV), range, and Shapiro-Wilk W values were calculated for each of the following:  $EC_{25}$ ,  $EC_{50}$ ,  $EC_{75}$ , slope, asymmetry (s), coefficient of determination (CD or  $r^2$ ) and TDT. The Shapiro-Wilk test evaluated the fitting of sample quartiles to standard normal quartiles [32].

Simple linear regression analyses were performed within SigmaPlot to delineate any correlations between the 45-min MX  $EC_{50}$  values and the following: 45-min  $EC_{50}$  values for A-

alone (3M2B), B-alone (both in 3M2B-equivalent concentrations and actual B concentrations - all in  $\mu\text{M}$ ),  $\text{AQ}_{50}$ ,  $\text{IQ}_{50}$  and the 15- to 45-min TDT values for B-alone.

Testing of 32 binary mixtures containing 3M2B offered an opportunity to develop equations to estimate mixture toxicity for other 3M2B-containing mixtures not tested herein. This was done by multiple linear regression (MLR) within SigmaPlot, using test data for MX  $\text{EC}_x$  as the dependent variable and either the CA  $\text{EC}_x$  and  $\text{AQ}_x$  or the IA  $\text{EC}_x$  and  $\text{IQ}_x$  as independent variables at each exposure duration. For each equation,  $\text{CD}$  ( $r^2$ ), standard error of the estimate (SEE), and variance inflation factor (VIF) values were included. The VIF assessed the likelihood of collinearity between independent variables, with values  $<5.0$  having low concern for collinearity [33].

## Results and discussion

While toxicity was determined for three exposure durations (15-, 30-, and 45-min), for space considerations detailed results are presented primarily for the latter timepoint.

The repeatability of results for Microtox testing was evaluated by examining the results from all 3M2B-alone tests (Table 2). Therein, CV values below 20 were obtained for each mean  $\text{EC}_x$  value and each mean slope,  $\text{CD}$ , and TDT value. Asymmetry ( $s$ ) values for 3M2B had more variable means, but CV values remained below 40, thereby being acceptable for test-to-test variation [34]. In addition, the W statistic from the Shapiro-Wilk test denoted the fitting of sample quartiles to standard normal quartiles. Sample values with a W score = 1

**Table 2. Statistics for 3-methyl-2-butanone (3M2B) alone ( $n = 33$ ).**

| Parameter          | Time (min) | Mean    | Std. dev. | CV <sup>a</sup> | Range | SW-W <sup>b</sup> |
|--------------------|------------|---------|-----------|-----------------|-------|-------------------|
| $\text{EC}_{25}^c$ | 15         | 140.16  | 24.1      | 17.2            | 85.8  | 0.925             |
|                    | 30         | 146.53  | 27.1      | 18.5            | 105.0 | 0.940             |
|                    | 45         | 152.38  | 26.7      | 17.5            | 103.2 | 0.943             |
| $\text{EC}_{50}^c$ | 15         | 442.05  | 62.0      | 14.0            | 241.0 | 0.931             |
|                    | 30         | 441.38  | 72.9      | 16.5            | 326.8 | 0.917             |
|                    | 45         | 461.85  | 73.4      | 15.9            | 319.7 | 0.944             |
| $\text{EC}_{75}^c$ | 15         | 1446.52 | 189.2     | 13.1            | 676.8 | 0.930             |
|                    | 30         | 1467.13 | 219.9     | 15.0            | 898.7 | 0.932             |
|                    | 45         | 1492.50 | 240.0     | 16.1            | 994.0 | 0.944             |
| slope              | 15         | 0.792   | 0.066     | 8.3             | 0.35  | 0.800             |
|                    | 30         | 0.826   | 0.079     | 9.6             | 0.49  | 0.881             |
|                    | 45         | 0.883   | 0.068     | 7.7             | 0.39  | 0.840             |
| $s^d$              | 15         | 2.34    | 0.91      | 39.1            | 3.67  | 0.910             |
|                    | 30         | 1.87    | 0.73      | 39.0            | 3.62  | 0.895             |
|                    | 45         | 1.46    | 0.50      | 34.2            | 2.94  | 0.771             |
| $\text{CD}^e$      | 15         | 0.9985  | 0.0010    | 0.10            | 0.004 | 0.859             |
|                    | 30         | 0.9985  | 0.0009    | 0.09            | 0.003 | 0.904             |
|                    | 45         | 0.9984  | 0.0009    | 0.09            | 0.004 | 0.926             |
| TDT <sup>f</sup>   | 15–45      | -14.1   | 9.63      | 6.8             | 44.1  | 0.967             |

<sup>a</sup> CV: coefficient of variation

<sup>b</sup> SW-W: Shapiro-Wilk W—goodness of fit test

<sup>c</sup> concentrations are  $\mu\text{M}$  3M2B

<sup>d</sup>  $s$ : asymmetry

<sup>e</sup>  $\text{CD}$ —coefficient of determination ( $r^2$ )

<sup>f</sup> TDT: 15 to 45-min time-dependent toxicity value at  $\text{EC}_{50}$

<https://doi.org/10.1371/journal.pone.0306382.t002>

represent a perfect fit [32]. For 3M2B,  $W$  values ranged from 0.771 to 0.967, with 13 of 19 endpoints above 0.900, including all nine  $EC_x$  values.

For each combination, 45-min  $EC_{50}$  values for MX, A, and B (the latter given as both 3M2B-equivalent and actual B concentrations), the calculated 45-min  $AQ_{50}$  and  $IQ_{50}$ , and the 15 to 45-min TDT values are provided (Table 3). For comparative purposes, the MX  $EC_{50}$  values are listed within the table from the most toxic to the least toxic combination. Simple linear regressions conducted for the MX  $EC_{50}$  values vs. those from each other data column resulted in  $r^2$  values  $< 0.700$ , indicating no strong linear correlations between the MX data and the different variables.

When examining MX toxicity vs. the IA model at 45-min, non-sham MX toxicity was less than that predicted by IA for all combinations except for 3M2B-HPM (Table 4). When  $IQ_x$  values were tabulated for individual  $IQ_x$  effect levels, there were four  $IQ_{25}$  values  $< 0.90$  (lowest = 0.86), twelve were IA consistent, and sixteen were  $> 1.10$  (highest = 1.87). For the  $IQ_{50}$ , nine were IA consistent, the rest were  $> 1.10$  (high = 1.71). For the  $IQ_{75}$ , three were IA consistent, and the rest were  $> 1.10$  (highest = 2.14). These data are available at DOI: [10.17605/OSF.IO/2NVDW](https://doi.org/10.17605/OSF.IO/2NVDW).

For the CA model, before determining the combined effect of the 45-min MX data, the following points were addressed: 1) was the predicted IA  $EC_{50}$  more toxic than the predicted CA  $EC_{50}$ , 2) were all three  $AQ_x$  values ( $x$  includes 25, 50 or 75% effect levels) from 0.90 and 1.10, and 3) were the 'B' chemicals in each combination known or suspected to have the same toxic mechanism as 3M2B.

To address the first point, the toxicities of the predicted 45-min IA  $EC_{50}$  and CA  $EC_{50}$  values were compared graphically for each combination. This was done by ordering the IA  $EC_{50}$  data from most to least toxic on the Y-axis (Fig 1). Therein, it can be seen that the predicted IA  $EC_{50}$  was more toxic than the predicted CA  $EC_{50}$  for all 32 combinations. Thus, the IA model represents the greater toxic hazard for all MXs in this study. This is likely because 45-min CRC slopes for A and MX were mostly  $< 1.6$  [13]. All 32 A-alone tests and 28 of 32 MX tests had slopes  $< 1.6$ . Of the latter, only two had a slope  $> 1.7$ . These data are available at DOI: [10.17605/OSF.IO/2NVDW](https://doi.org/10.17605/OSF.IO/2NVDW). Comparatively, 17 B-alone CRCs had slopes  $< 1.7$ , while 15 CRCs had slopes  $> 1.7$ , with all but two of those being  $< 2.5$ . Therefore, it was likely that all non-sham mixtures fitting the CA designation at 45-min (see Table 4) had toxicity that was "coincident" with CA [13].

To address the second point, nine non-sham combinations had all three  $AQ_x$  values from 0.90 to 1.10. Moreover, five other combinations had at least two of the three  $AQ_x$  values below 0.90 (i.e., a greater-than CA combined effect). However, none of those showed toxicity greater than that predicted by the IA model. This is additional evidence for mixture toxicity being "coincident" with CA.

The third point was addressed by noting that all B agents (except for 3M2B and EFAC) are known/suspected to have a reactive mechanism of toxicity. At the same time, 3M2B is considered a non-reactive, non-polar narcotic (see Table 1). Therefore, mechanistically it is also unlikely that each non-sham mixture having  $AQ_x$  values fitting the CA designation (i.e.,  $0.90 \leq MX\ EC_x \leq 1.10$ ) were truly CA mechanistically. One should note that all chemicals exhibit a log Kow-determined, reversible, and non-covalent biomembrane fluidity change that alters cellular function (i.e., bioluminescence) [35]. This reversible inhibition may be superseded by covalent reactivity with cellular proteins, especially cystine-rich functional proteins and lysine-rich structural proteins. It is deemed likely that toxic potency for reactive electrophiles may be correlated to reactive mechanism and/or reaction rates.

The results do not provide clear insights into how mixture toxicity is related to the mechanism/mode of toxic action. However, upon examining the listed order of the B-agents in Fig 1

Table 3. 45-min toxicity, quotient and agent B TDT values for each combination.

| A-B <sup>a</sup>                                    | MX EC <sub>50</sub> <sup>b</sup> | A EC <sub>50</sub> | AQ <sub>50</sub> <sup>c</sup> | B EC <sub>50</sub> | B EC <sub>50</sub> <sup>d</sup> | IQ <sub>50</sub> <sup>c</sup> | B TDT <sup>e</sup> |
|-----------------------------------------------------|----------------------------------|--------------------|-------------------------------|--------------------|---------------------------------|-------------------------------|--------------------|
| 3M2B-BDNB                                           | 105.6                            | 361.4              | 1.16                          | 121.7              | 2.0                             | 1.38                          | 114.8              |
| 3M2B-26D4NP                                         | 115.0                            | 384.0              | 0.86                          | 203.6              | 0.3                             | 1.06                          | 54.9               |
| 3M2B-EBAC                                           | 151.7                            | 488.4              | 0.87                          | 272.1              | 1.4                             | 1.08                          | 118.4              |
| 3M2B-CDNB                                           | 153.9                            | 432.7              | 1.22                          | 178.1              | 5.1                             | 1.45                          | 115.2              |
| 3M2B-2C4NP                                          | 156.4                            | 376.5              | 1.05                          | 246.4              | 0.5                             | 1.19                          | 52.5               |
| 3M2B-3C24P                                          | 158.2                            | 541.5              | 0.99                          | 227.4              | 4.9                             | 1.06                          | 94.9               |
| 3M2B-ECAC                                           | 177.6                            | 497.0              | 0.77                          | 431.7              | 303.5                           | 0.99                          | 92.7               |
| 3M2B-TCLAN                                          | 178.1                            | 565.9              | 0.95                          | 280.4              | 6.7                             | 1.10                          | 43.1               |
| 3M2B-M2BP                                           | 185.9                            | 398.6              | 1.04                          | 323.1              | 83.3                            | 1.23                          | 75.8               |
| 3M2B-EP                                             | 187.4                            | 389.3              | 1.03                          | 341.8              | 5.0                             | 1.19                          | 107.9              |
| 3M2B-MC                                             | 194.2                            | 526.8              | 0.84                          | 411.7              | 1770.9                          | 0.93                          | 21.9               |
| 3M2B-EA                                             | 194.6                            | 399.2              | 0.96                          | 415.8              | 894.2                           | 1.17                          | 58.3               |
| 3M2B-MVK                                            | 204.5                            | 418.7              | 1.11                          | 327.5              | 2.7                             | 1.23                          | 99.0               |
| 3M2B-4NBB                                           | 208.9                            | 467.5              | 1.07                          | 332.8              | 0.8                             | 1.39                          | 99.9               |
| 3M2B-3M2B                                           | 214.5                            | 382.6              | 1.08                          | 411.3              | 411.3                           | 1.35                          | -25.1              |
| 3M2B-3C2B                                           | 218.2                            | 523.5              | 0.95                          | 411.4              | 138.6                           | 1.07                          | 55.1               |
| 3M2B-CLAN                                           | 233.2                            | 501.4              | 1.36                          | 261.4              | 596.4                           | 1.47                          | 106.7              |
| 3M2B-2HEA                                           | 245.9                            | 498.7              | 1.00                          | 488.7              | 604.1                           | 1.05                          | 95.1               |
| 3M2B-EVK                                            | 247.4                            | 398.1              | 1.13                          | 483.0              | 3.3                             | 1.24                          | 94.2               |
| 3M2B-23B                                            | 260.1                            | 374.0              | 1.19                          | 526.9              | 2811.4                          | 1.31                          | 85.4               |
| 3M2B-HPM                                            | 263.4                            | 505.9              | 0.82                          | 878.9              | 2908.2                          | 0.94                          | -8.0               |
| 3M2B-EFAC                                           | 264.7                            | 536.3              | 0.88                          | 684.2              | 11107.3                         | 1.18                          | 3.7                |
| 3M2B-34H                                            | 266.3                            | 344.4              | 1.04                          | 983.0              | 1978.0                          | 1.25                          | 27.6               |
| 3M2B-M2CA                                           | 285.7                            | 451.8              | 1.17                          | 527.6              | 3.5                             | 1.32                          | 110.6              |
| 3M2B-BRAN                                           | 286.3                            | 510.9              | 1.22                          | 434.5              | 7.3                             | 1.28                          | 104.7              |
| 3M2B-IAN                                            | 290.4                            | 482.0              | 1.22                          | 470.4              | 5.7                             | 1.28                          | 101.0              |
| 3M2B-23P                                            | 302.9                            | 382.9              | 1.45                          | 459.7              | 2636.8                          | 1.71                          | 41.9               |
| 3M2B-DEM                                            | 311.8                            | 473.2              | 1.20                          | 576.5              | 240.3                           | 1.41                          | 51.6               |
| 3M2B-DES                                            | 332.4                            | 486.9              | 1.01                          | 1002.2             | 279.9                           | 1.18                          | -26.6              |
| 3M2B-BGE                                            | 371.4                            | 664.1              | 1.05                          | 751.5              | 4143.7                          | 1.23                          | -14.6              |
| 3M2B-DMS                                            | 390.1                            | 510.9              | 1.14                          | 1045.3             | 356.9                           | 1.29                          | 21.7               |
| 3M2B-4VP                                            | 397.5                            | 550.9              | 1.19                          | 845.9              | 57.7                            | 1.28                          | 17.4               |
| r <sup>2</sup> vs. MX EC <sub>50</sub> <sup>f</sup> |                                  | 0.171              | 0.139                         | 0.685              | 0.016                           | 0.074                         | 0.228              |

<sup>a</sup> A:3-methyl-2-butanone (3M2B), B: an electrophile (see Table 1), MX: A+B mixture<sup>b</sup> concentrations are given as 3M2B-equivalent values in  $\mu\text{M}$ —unless noted otherwise<sup>c</sup> values are unitless<sup>d</sup> actual B-alone concentrations ( $\mu\text{M}$ ) before conversion to 3M2B equivalent values<sup>e</sup> percent difference in toxicity for actual B-alone concentrations from 15- to 45-min<sup>f</sup> coefficient of determination for simple linear regressions<https://doi.org/10.1371/journal.pone.0306382.t003>

and Table 1 (i.e., from greatest to least toxic as predicted by 45-min IA EC<sub>50</sub> toxicity) and in Table 3 (from greatest to least observed toxicity at the 45-min MX EC<sub>50</sub>) one can see that the upper and lower chemicals in each listing are similar. As shown in Table 1, SNAr reactive chemicals (i.e., BDNB, CDNB, 26D4NP, and 2C4NP) are among the most toxic when given with 3M2B. Likewise, several chemicals (e.g., HPM, BGE, DES, DMS), that are slightly or weakly reactive with glutathione, are among the least toxic with 3M2B (Tables 1 and 3). The

Table 4. 45-min non-sham mixture toxicity designations vs. IA and CA models<sup>a</sup>.

| Mixture Toxicity vs. IA and CA                        | Agent B <sup>b</sup> |            |         |       |       |
|-------------------------------------------------------|----------------------|------------|---------|-------|-------|
| Consistent with IA; more toxic than CA                | HPM                  |            |         |       |       |
| Crosses <sup>c</sup> IA; more toxic than CA           | 26D4NP               |            |         |       |       |
| Crosses IA; crosses CA                                | EFAC                 |            |         |       |       |
| Less toxic than IA; more toxic than CA                | EBAC                 | ECAC       |         |       |       |
| Less toxic than IA; 'coincident' <sup>d</sup> with CA | 2C4NP 2HEA           | 3C2B 3C24P | 34H DES | EA EP | TCLAN |
| Less toxic than IA; crosses CA                        | 4NBB                 | MC         |         |       |       |
| Less toxic than IA and CA                             | 23B                  | BDNB       | CDNB    | DMS   | M2BP  |
|                                                       | 23P                  | BGE        | CLAN    | EVK   | M2CA  |
|                                                       | 4VP                  | BRAN       | DEM     | IAN   | MVK   |

<sup>a</sup> IA—Independent action, CA—concentration addition<sup>b</sup> mixtures are listed by chemical B abbreviation; chemical A was always 3M2B<sup>c</sup> the MX curve had IQ<sub>x</sub> and/or AQ<sub>x</sub> values that crossed the IA and/or CA range, respectively<sup>d</sup> designation indicates the predicted IA EC<sub>50</sub> was more toxic than the predicted CA EC<sub>50</sub><https://doi.org/10.1371/journal.pone.0306382.t004>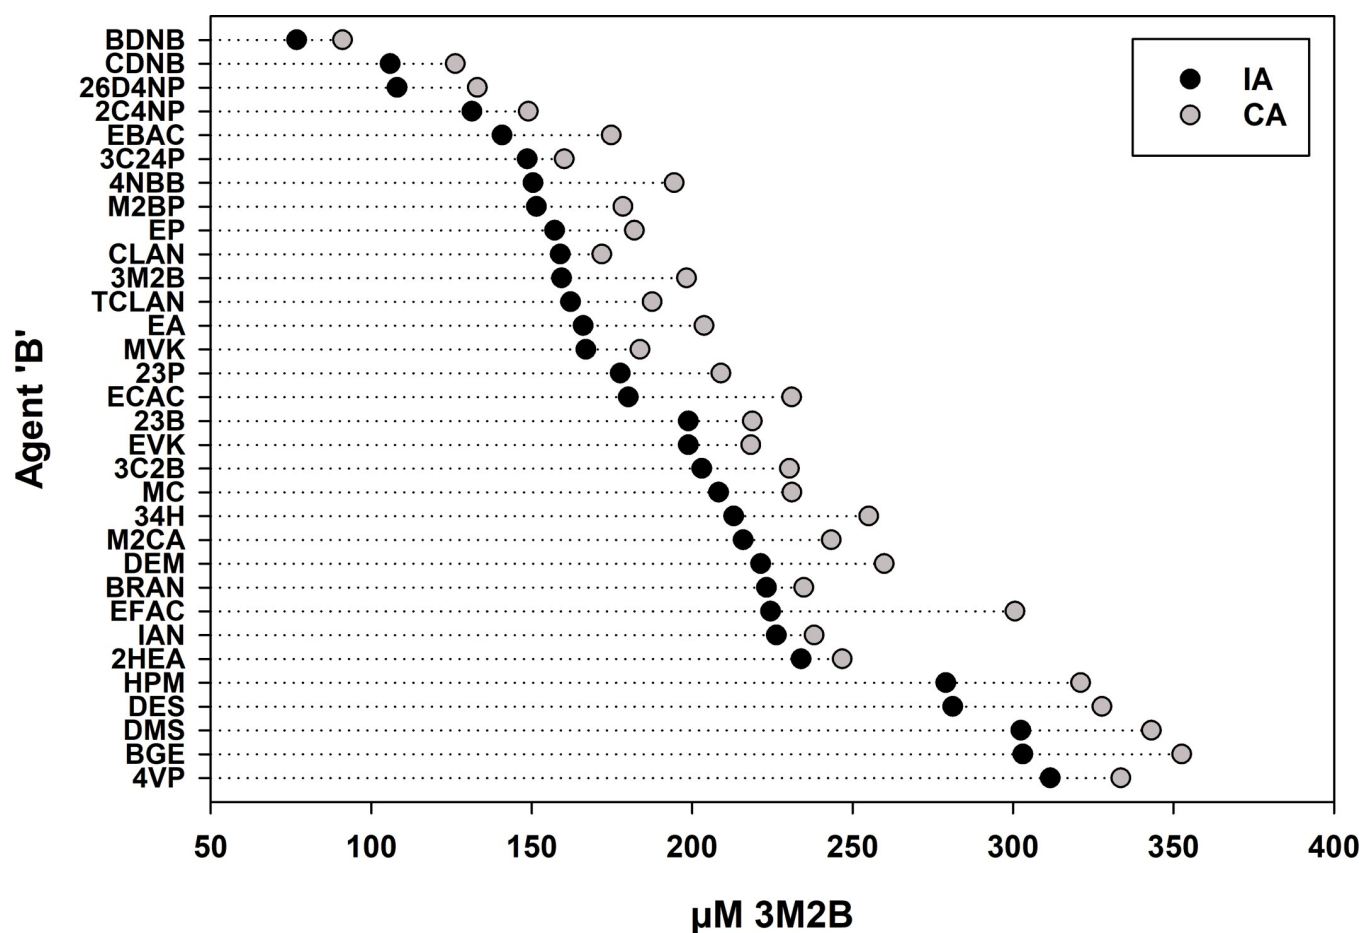

**Fig 1. Comparative plot of predicted independent action (IA) and concentration addition (CA) EC<sub>50</sub> values after 45-min exposures.** Predicted IA toxicity was always greater (i.e., at a lower 3M2B-equivalent concentration) than predicted CA toxicity. The combinations are listed on the Y-axis simply as agent 'B', since 3M2B was always agent 'A'. The predicted IA EC<sub>50</sub> values are shown from most toxic to least toxic.

<https://doi.org/10.1371/journal.pone.0306382.g001>

most notable exception is 4VP, a well-studied directing-acting electrophile (see Table 1) that was the least toxic with 3M2B (Table 3).

The toxic effect, inhibition of bioluminescence, and the short duration of the assay advocate that membrane interrelation and covalent binding to soft nucleophiles (i.e., function proteins) are the most likely MOAs. Since 3M2B is non-electrophilic and a classic baseline toxicant, its MOA is exclusively reversible membrane perturbation. The minimal changes in the mean 3M2B potency values with time (see Table 2) indicate that this MOA acts rapidly. Except for EFAC, which was unreactive experimentally, the remaining 30 chemicals demonstrated some

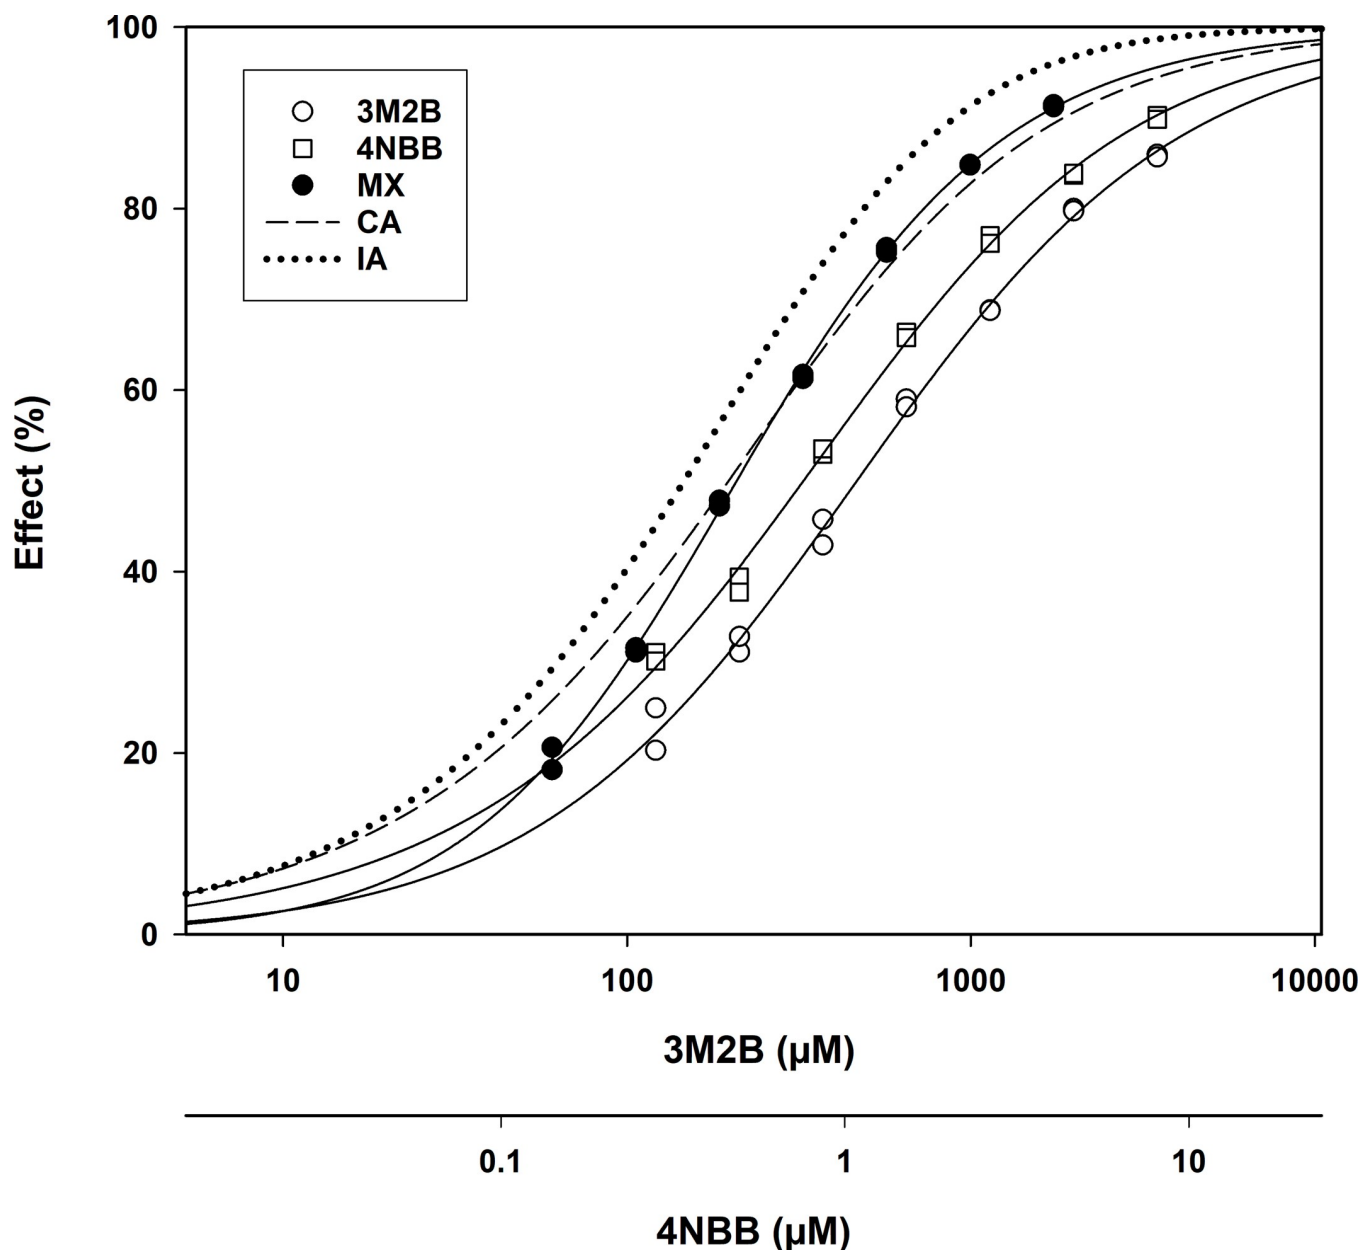

**Fig 2. Concentration-response curve plot.** The plotted curves are for 3-methyl-2-butanone (3M2B) alone, 4-nitrobenzyl bromide (4NBB) alone, the 3M2B-4NBB mixture and the predicted concentration addition (CA) and independent action (IA) models. Note the crossing of the MX CRC with the predicted CA CRC. All CRCs are given in 3M2B concentrations (the upper X-axis). The lower X-axis depicts the CRC for actual 4NBB alone concentrations.

<https://doi.org/10.1371/journal.pone.0306382.g002>



degree of soft electrophilicity (see Table 1). However, from Table 1, neither the weight of evidence (i.e., proven, likely, probable, or suspected) nor the potency (i.e., extreme, high, moderate, slight, weak) was related to the rank order for MX toxicity (Table 3).

The 45-min combined effects for each combination as categorized, included instances in which the actual MX CRC crossed over the predicted CA and/or IA CRC. An example of one such instance is presented (Fig 2). This phenomenon suggests a difference in biological action for the chemicals in a given mixture.

Multiple linear regression equations were generated for the IA and CA models at the EC<sub>25</sub>, EC<sub>50</sub>, and EC<sub>75</sub> at each exposure duration (Table 5 and Fig 3). Each had an  $r^2 > 0.950$  and a VIF  $< 1.2$ . These results suggest that the approach has utility in estimating mixture toxicity for 3M2B-containing binary combinations that were not tested herein. While these equations only directly apply to the model organism used in this study, conceptually, such MLR equations can be generated for other model organisms, reducing the need for actual mixture testing. Once one has the MLR equation for a given A, the established A-alone data, and the B-alone data for any additional B chemical (preferably with the same dilution factor) can be used to generate predicted CA and IA EC<sub>x</sub> values. Then, the respective AQ<sub>x</sub> or IQ<sub>x</sub> values of interest can be inserted into the appropriate equation to obtain the MX EC<sub>x</sub> estimate.

Chemicals from several specific reaction mechanisms and each of the four MOA noted above were tested with 3M2B in this study, so the approach appears robust. With data and analyses already completed, future reports will demonstrate that this approach consistently

**Table 5. Multiple linear regression equations for estimating mixture toxicity for 3M2B-containing binary mixtures<sup>a</sup>.**

| Time <sup>b</sup> | IA - Multiple Linear Regression Equations                                        | CD <sup>c</sup> | SEE <sup>d</sup> | VIF <sup>e</sup> |
|-------------------|----------------------------------------------------------------------------------|-----------------|------------------|------------------|
| 15                | $MX\ EC_{25} = -89.319 + (1.046 \times IA\ EC_{25}) + (84.469 \times IQ_{25})$   | 0.986           | 3.163            | 1.079            |
| 30                | $MX\ EC_{25} = -74.708 + (1.061 \times IA\ EC_{25}) + (69.894 \times IQ_{25})$   | 0.994           | 2.202            | 1.043            |
| 45                | $MX\ EC_{25} = -68.819 + (1.086 \times IA\ EC_{25}) + (63.531 \times IQ_{25})$   | 0.990           | 2.921            | 1.004            |
| 15                | $MX\ EC_{50} = -269.008 + (1.172 \times IA\ EC_{50}) + (227.359 \times IQ_{50})$ | 0.988           | 7.669            | 1.107            |
| 30                | $MX\ EC_{50} = -233.279 + (1.237 \times IA\ EC_{50}) + (186.145 \times IQ_{50})$ | 0.988           | 7.670            | 1.067            |
| 45                | $MX\ EC_{50} = -228.200 + (1.234 \times IA\ EC_{50}) + (183.833 \times IQ_{50})$ | 0.989           | 8.053            | 1.019            |
| 15                | $MX\ EC_{75} = -846.300 + (1.416 \times IA\ EC_{75}) + (590.173 \times IQ_{75})$ | 0.986           | 26.27            | 1.089            |
| 30                | $MX\ EC_{75} = -780.760 + (1.532 \times IA\ EC_{75}) + (504.956 \times IQ_{75})$ | 0.970           | 38.42            | 1.045            |
| 45                | $MX\ EC_{75} = -694.802 + (1.504 \times IA\ EC_{75}) + (456.516 \times IQ_{75})$ | 0.958           | 48.03            | 1.042            |
| Time              | CA - Multiple Linear Regression Equations                                        | CD              | SEE              | VIF              |
| 15                | $MX\ EC_{25} = -99.540 + (1.052 \times CA\ EC_{25}) + (94.630 \times AQ_{25})$   | 0.990           | 2.685            | 1.000            |
| 30                | $MX\ EC_{25} = -83.003 + (1.072 \times CA\ EC_{25}) + (77.179 \times AQ_{25})$   | 0.994           | 2.082            | 1.002            |
| 45                | $MX\ EC_{25} = -75.604 + (1.068 \times CA\ EC_{25}) + (71.207 \times AQ_{25})$   | 0.992           | 2.661            | 1.008            |
| 15                | $MX\ EC_{50} = -279.011 + (1.026 \times CA\ EC_{50}) + (272.921 \times AQ_{50})$ | 0.992           | 6.426            | 1.037            |
| 30                | $MX\ EC_{50} = -249.576 + (1.053 \times CA\ EC_{50}) + (236.791 \times AQ_{50})$ | 0.991           | 6.669            | 1.000            |
| 45                | $MX\ EC_{50} = -233.926 + (1.063 \times CA\ EC_{50}) + (219.256 \times AQ_{50})$ | 0.987           | 8.715            | 1.008            |
| 15                | $MX\ EC_{75} = -904.654 + (0.982 \times CA\ EC_{75}) + (923.454 \times AQ_{75})$ | 0.989           | 23.70            | 1.010            |
| 30                | $MX\ EC_{75} = -779.087 + (1.050 \times CA\ EC_{75}) + (743.868 \times AQ_{75})$ | 0.984           | 28.59            | 1.002            |
| 45                | $MX\ EC_{75} = -660.791 + (1.087 \times CA\ EC_{75}) + (601.488 \times AQ_{75})$ | 0.974           | 37.73            | 1.029            |

<sup>a</sup> 3M2B: 3-methyl-2-butanone, MX: mixture, IA: independent action, CA: concentration addition

<sup>b</sup> duration of exposure in min

<sup>c</sup> coefficient of determination ( $r^2$ )

<sup>d</sup> standard error of the estimate

<sup>e</sup> variance inflation factor

<https://doi.org/10.1371/journal.pone.0306382.t005>

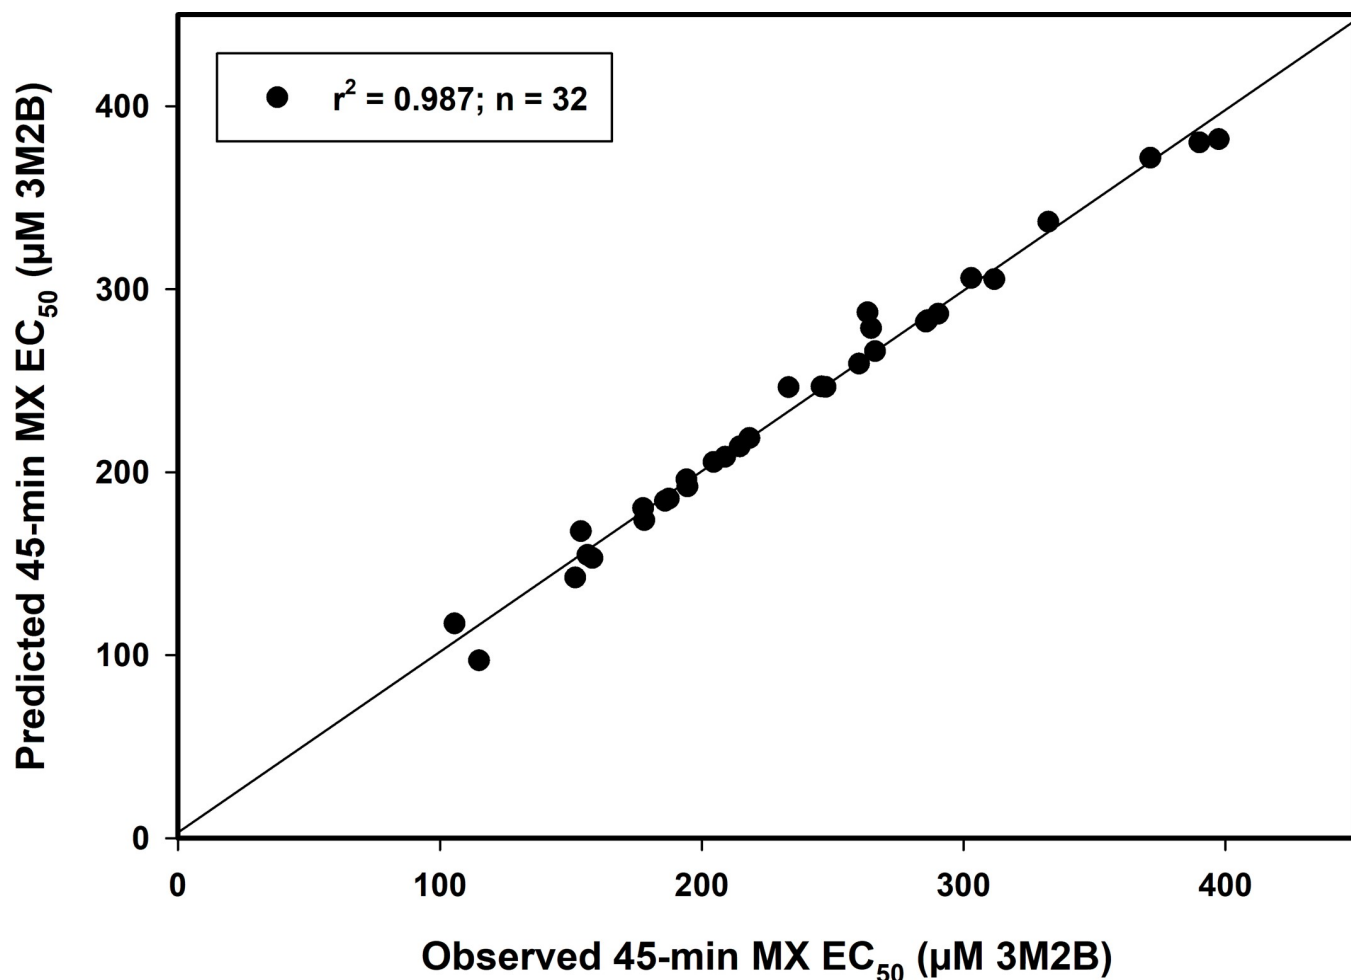

**Fig 3. Linear regression plot of observed vs. predicted mixture toxicity for binary combinations containing 3M2B.** The 45-min CA EC<sub>50</sub> and AQ<sub>50</sub> values generated in this study were inserted into the equation:  $\text{MX EC}_{50} = -233.926 + (1.063 * \text{CA EC}_{50}) + (219.256 * \text{AQ}_{50})$  (see Table 5) to generate the predicted 45-min MX EC<sub>50</sub> values for each combination. The predicted MX EC<sub>50</sub> values were then plotted against the observed 45-min MX EC<sub>50</sub> values.

<https://doi.org/10.1371/journal.pone.0306382.g003>

produces high-quality MLR equations for other “chemical A” selections tested in an A-B series.

The MLR equations for the 15- and 30-min data are presented to allow modeling the dynamics of mixture toxicity over time. For example, the Lambert model [36] has a time component that will enable data for each exposure duration to be analyzed together and for response surface analysis. Dynamic mixture toxicity modeling may provide further insights into chemical mechanisms or modes of toxic action.

While MLR equations for estimating 45-min MX toxicity at the EC<sub>10</sub> were also generated, they are not presented, even though  $r^2$  and VIF values were similar to those noted (Table 5). This choice was made because concentration selection was not designed to emphasize low-level effects. The general approach taken by Escher and colleagues [11] is amenable to generating MLR equations at low CRC effect levels.

## Conclusions

Mixture toxicity for binary combinations of 3M2B and an electrophile produced the following results: 1) the predicted IA EC<sub>50</sub> was always more toxic than that for CA, 2) combined effects obtained were classified into one of seven groupings based on three relevant criteria, 3) non-sham MXs having toxicity consistent with CA were classified as being “coincident” with CA rather than fitting the mechanism-based CA definition, and 4) high-quality MLR equations for estimating mixture toxicity of 3M2B-containing binary mixtures were obtained for both IA and CA at each exposure duration and effect level. Conceptually, the approach can be used with other model organisms and in low-effects level testing.

## Supporting information

**S1 Fig. Concentration-response curve (CRC) plot.** The plotted curves are for 3-methyl-2-butanone (3M2B) alone, hydroxypropyl methacrylate alone (HPM), the 3M2B-HPM mixture (MX) and the predicted concentration addition (CA) and independent action (IA) models. Note that the MX toxicity is consistent with that predicted for IA but more toxic than predicted for CA. Each CRC is given in 3M2B-equivalent concentrations (the upper X-axis). The lower X-axis depicts the CRC for actual HPM alone concentrations.  
(TIF)

**S2 Fig. Concentration-response curve (CRC) plot.** The plotted curves are for 3-methyl-2-butanone (3M2B) alone, 2,6-dichloro-4-nitropyridine alone (26D4NP), the 3M2B-26D4NP mixture (MX) and the predicted concentration addition (CA) and independent action (IA) models. Note that the MX curve crosses the IA curve but is more toxic than predicted for CA. Each CRC is given in 3M2B-equivalent concentrations (the upper X-axis). The lower X-axis depicts the CRC for actual 26D4NP alone concentrations.  
(TIF)

**S3 Fig. Concentration-response curve (CRC) plot.** The plotted curves are for 3-methyl-2-butanone (3M2B) alone, ethyl fluoroacetate alone (EFAC), the 3M2B-EFAC mixture (MX) and the predicted concentration addition (CA) and independent action (IA) models. Note that the MX toxicity curve crosses both the IA and CA curves. Each CRC is given in 3M2B-equivalent concentrations (the upper X-axis). The lower X-axis depicts the CRC for actual EFAC alone concentrations.  
(TIF)

**S4 Fig. Concentration-response curve (CRC) plot.** The plotted curves are for 3-methyl-2-butanone (3M2B) alone, ethyl bromoacetate alone (EBAC), the 3M2B-EBAC mixture (MX) and the predicted concentration addition (CA) and independent action (IA) models. Note that the MX curve shows toxicity at (i.e., lower portion of curve) or less than (i.e., upper portion of curve) that predicted for IA but more toxic than predicted for CA. Each CRC is given in 3M2B-equivalent concentrations (the upper X-axis). The lower X-axis depicts the CRC for actual EBAC alone concentrations.  
(TIF)

**S5 Fig. Concentration-response curve (CRC) plot.** The plotted curves are for 3-methyl-2-butanone (3M2B) alone, 3,4-hexanedione alone (34H), the 3M2B-34H mixture (MX) and the predicted concentration addition (CA) and independent action (IA) models. Note that the MX curve shows toxicity that is less than that predicted for IA but ‘coincident’ with that predicted for CA. Each CRC is given in 3M2B-equivalent concentrations (the upper X-axis). The

lower X-axis depicts the CRC for actual 3H alone concentrations.  
(TIF)

**S6 Fig. Concentration-response curve (CRC) plot.** The plotted curves are for 3-methyl-2-butanone (3M2B) alone, methyl-2-chloroacetate alone (M2CA), the 3M2B-M2CA mixture (MX) and the predicted concentration addition (CA) and independent action (IA) models. Note that the MX curve shows toxicity that is less than that predicted for both IA and CA. Each CRC is given in 3M2B-equivalent concentrations (the upper X-axis). The lower X-axis depicts the CRC for actual M2CA alone concentrations.  
(TIF)

## Acknowledgments

We gratefully acknowledge the contributions made by Dr. Gerald Pösch, University of Graz, Austria, in previous studies.

## Author Contributions

**Conceptualization:** Douglas A. Dawson, Terry W. Schultz.

**Data curation:** Douglas A. Dawson.

**Formal analysis:** Douglas A. Dawson, Terry W. Schultz.

**Investigation:** Douglas A. Dawson.

**Methodology:** Douglas A. Dawson, Terry W. Schultz.

**Project administration:** Douglas A. Dawson.

**Writing – original draft:** Douglas A. Dawson.

**Writing – review & editing:** Terry W. Schultz.

## References

1. Cedergreen N. Quantifying synergy: A systematic review of mixture toxicity studies within environmental toxicology. *PLOS ONE*. 2014; 9(5): e96580. <https://doi.org/10.1371/journal.pone.0096580> PMID: 24794244
2. Markert N, Rhiem S, Trimborn M, Guhl B. Mixture toxicity in the Erft River: Assessment of ecological risks and toxicity drivers. *Environ Sci Eur*. 2020; 32: 51. <https://doi.org/10.1186/s12302-020-00326-5>
3. Safe SH. Polychlorinated biphenyls (PCBs): Environmental impact, biochemical and toxic responses, and implications for risk assessment. *Crit Rev Toxicol*. 1994; 24: 87–149. <https://doi.org/10.3109/10408449409049308> PMID: 8037844
4. Wu X, Cobbina SJ, Mao G, Xu H, Zhang Z, Yang L. A review of toxicity and mechanisms of individual and mixtures of heavy metals in the environment. *Environ Sci Pollut Res*. 2016; 23: 8244–8259. <https://doi.org/10.1007/s11356-016-6333-x> PMID: 26965280
5. Godoy AA, de Oliveira AC, Silva JGM. Single and mixture toxicity of four pharmaceuticals of environmental concern to aquatic organisms, including a behavioral assessment. *Chemosphere*. 2019; 235: 373–382. <https://doi.org/10.1016/j.chemosphere.2019.06.200> PMID: 31271997
6. Chen C, Wang Y, Qian Y, Zha X, Wang Q. The synergistic toxicity of the multiple chemical mixtures: Implications for risk assessment in the terrestrial environment. *Environ International*. 2015; 77: 95–105. <https://doi.org/10.1016/j.envint.2015.01.014> PMID: 25667058
7. ECETOC Technical Report No. 80. Aquatic toxicity of mixtures. European Centre for Ecotoxicology and Toxicology of Chemicals: Brussels, Belgium, 2001.
8. Xu S, Nirmalakhandan N. Use of QSAR models in predicting joint effects in multi-component mixtures of organic chemicals. *Wat Res*. 1998; 32: 2391–2399.
9. Chen CY, Chiou YS. Toxicity of binary mixtures of organic chemicals. *Environ Toxicol Wat Qual*. 1995; 10: 97–106.

10. Chen CY, Yeh JT. Toxicity of binary mixtures of reactive toxicants. *Environ Toxicol Wat Qual*. 1996; 11: 83–90.
11. Escher B, Braun G, Zarfl C. Exploring the concepts of concentration addition and independent action using a linear low-effect mixture model. *Environ Toxicol Chem*. 2020; 39: 2552–2559. <https://doi.org/10.1002/etc.4868> PMID: 32897547
12. Loewe S, Muischnek H. Über kombinationswirkungen-Mitteilung: Hilfsmittel der fragestellung. *Naunyn-Schmiedeberg's Archiv Experimen Pathol Pharmacol*. 1926; 114: 313–326.
13. Pösch G. Combined effects of drugs and toxic chemicals: Modern evaluation in theory and practice. Vienna: Springer; 1993.
14. Hill AV. The possible effects of the aggregation of the molecules of haemoglobin on its dissociation curves. *J. Physiol. (London)*. 1910; 40: Proceedings iv–vii.
15. Greco WR, Bravo G, Parsons JC. The search for synergy: A critical review from a response surface perspective. *Pharmacol Rev*. 1995; 47: 331–385. PMID: 7568331
16. Altenburger R, Backhaus T, Boedeker W, Faust M, Scholze M, Grimme LH. Predictability of the toxicity of multiple chemical mixtures to *Vibrio fischeri*: Mixtures composed of similarly acting chemicals. *Environ Toxicol Chem*. 2000; 19: 2341–2347.
17. Dawson DA, Genco N, Bensinger HM, Guinn D, Il'Giovine ZJ, Schultz TW, et al. Evaluation of an asymmetry parameter for curve-fitting in single-chemical and mixture toxicity assessment. *Toxicology*. 2012; 292: 156–161. <https://doi.org/10.1016/j.tox.2011.12.006> PMID: 22210403
18. Watt J, Webster TF, Schlezinger JJ. Generalized concentration addition modeling predicts mixture effects of environmental PPAR $\gamma$  agonists. *Toxicol Sci*. 2016; 153: 18–27.
19. Bliss CI. The toxicity of poisons applied jointly. *Ann Appl Biol*. 1939; 26: 585–615.
20. Dawson DA, Pösch G, Schultz TW. Mixture toxicity of S<sub>N</sub>2-reactive soft electrophiles: 3 –Evaluation of ethyl  $\alpha$ -halogenated acetates with  $\alpha$ -halogenated acetonitriles. *Arch Environ Contam Toxicol*. 2014; 66: 248–258.
21. Schwöbel JAH, Koleva YK, Bajot F, Enoch SJ, Hewitt M, Madden JC, et al., Measurement and estimation of electrophilic reactivity for predictive toxicology. 2011; *Chem Rev*. 111: 2562–2596. [Supporting information and database available from: <http://pubs.acs.org/doi/suppl/10.1021/cr100098n>] <https://doi.org/10.1021/cr100098n> PMID: 21401043
22. Organization for Economic Co-operation and Development (OECD). QSAR Toolbox, 4.5; OASIS, Laboratory of Mathematical Chemistry: Bourgas, Bulgaria, 2023.
23. Aptula AO, Roberts DW. Mechanistic applicability domains for nonanimal-based prediction of toxicological end points: General principles and application to reactive toxicity. *Chem Res Toxicol*. 2006; 19: 1097–1105. <https://doi.org/10.1021/tx0601004> PMID: 16918251
24. Enoch SJ, Ellison CM, Schultz TW, Cronin MTD. A review of the electrophilic reaction chemistry involved in covalent protein binding relevant to toxicity. *Crit Rev Toxicol*. 2011; 41: 783–802. <https://doi.org/10.3109/10408444.2011.598141> PMID: 21809939
25. LoPachin RM, Geohagen BC, Nordstroem LU. Mechanisms of soft and hard electrophile toxicities. *Toxicology*. 2019; 418: 62–69. <https://doi.org/10.1016/j.tox.2019.02.005> PMID: 30826385
26. Schultz TW, Yarbrough JW, Johnson, EL. Structure-activity relationships for glutathione reactivity of carbonyl-containing compounds. *SAR QSAR Environ Res*. 2005; 16: 313–322.
27. Gerberick GF, Vassallo JD, Bailey RE, Chaney JG, Morrall SW, Lepoittevin JP. Development of a peptide reactivity assay for screening contact allergens. *Toxicol Sci*. 2004; 81: 332–343. <https://doi.org/10.1093/toxsci/kfh213> PMID: 15254333
28. Gerberick GF, Vassallo JD, Foertsch LM, Price BB, Chaney JG, Lepoittevin JP. Quantification of chemical peptide reactivity for screening contact allergens: A classification tree model approach. *Toxicol Sci*. 2007; 97: 417–427. <https://doi.org/10.1093/toxsci/kfm064> PMID: 17400584
29. Dawson DA, Jeyaratnam J, Mooneyham T, Pösch G, Schultz TW. Mixture toxicity of S<sub>N</sub>2-reactive soft electrophiles: 1 –Evaluation of mixtures containing  $\alpha$ -halogenated acetonitriles. *Arch Environ Contam Toxicol*. 2010; 59: 532–541.
30. Gagan EM, Hull MW, Schultz TW, Pösch G, Dawson DA. Time dependence in mixture toxicity with soft electrophiles: 1. Combined effects of selected S<sub>N</sub>2 and S<sub>N</sub>Ar-reactive chemicals with a nonpolar narcotic. *Arch Environ Contam Toxicol* 2007; 52: 283–293.
31. Dawson DA, Mooneyham T, Jeyaratnam J, Pösch G, Schultz TW. Mixture toxicity of S<sub>N</sub>2-reactive soft electrophiles: 2 –Evaluation of mixtures containing halogenated ethyl acetates. *Arch Environ Contam Toxicol*. 2011; 61: 547–557.
32. Shapiro SS, Wilk MB. An analysis of variance test for normality (complete samples). *Biometrika*. 1965; 52: 591–611.

33. Sheather S. A modern approach to regression with R. New York: Springer; 2009.
34. Parkhurst BR, Warren-Hicks W, Noel LE. Performance characteristics of effluent toxicity tests: Summarization and evaluation of data. *Environ. Toxicol. Chem.* 1992; 11: 771–791.
35. Dusa F, Chen W, Witos J, Rantamäki AH, King AWT, Sklavounos E, et al. Immobilization of natural lipid biomembranes and their interactions with choline carboxylates. A nanoplasmonic sensing study. *Biochim, Biophys. Acta–Biomembranes* 2020; 1862, <https://doi.org/10.1016/j.bbamem.2019.183115>
36. Lambert RJW, Dawson DA. New models for the time dependent toxicity of individual and combined toxicants. *Toxicol Res.* 2019; 8: 509–521. <https://doi.org/10.1039/c9tx00005d> PMID: 31367334
